# Supplementary material for: Facile Solvothermal Synthesis of BiOCl/ZnO Heterostructures with Enhanced Photocatalytic Activity
Source: Hindawi journal article supplement (doi:10.1155/2014/347061), 2014-01-01
Supplement: f1 [file 347061.f1.pdf]

## Supporting Information

### Facile solvothermal synthesis of BiOCl/ZnO heterostructures with enhanced photocatalytic activity

Yong-Fang Li,<sup>a</sup> Ming Zhang,<sup>c</sup> Dan-Lu Guo,<sup>b</sup> Fei-Xia He,<sup>b</sup> Ying-Zhu Li,<sup>b</sup> Ai-Jun Wang<sup>b\*</sup>

<sup>a</sup> *College of Chemistry and Chemical Engineering, Henan Institute of Science and Technology, Xinxiang 453003, China*

<sup>b</sup> *College of Geography and Environmental Science, Zhejiang Normal University, Jinhua, 321004, China*

<sup>c</sup> *School of Chemistry and Chemical Engineering, Henan Normal University, Xinxiang, 453007, China*

*\*Corresponding author: Tel./Fax: +86-579-82282269, E-mail:ajwang@zjnu.cn (AJW).*

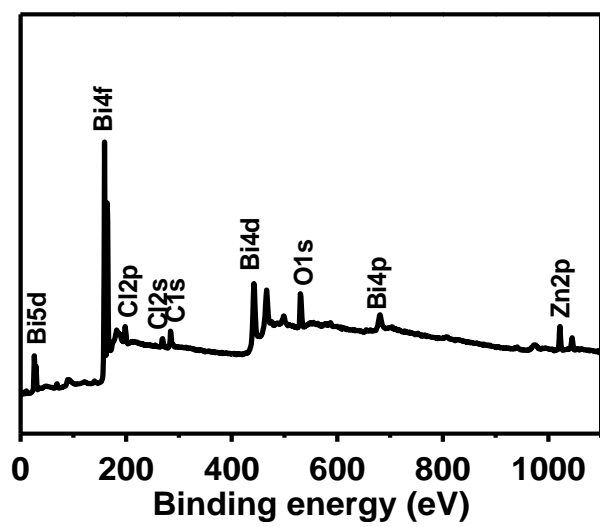

**Fig. S1.** XPS survey spectrum of the  $(\text{BiOCl})_{0.6}(\text{ZnO})_{0.4}$  composites.

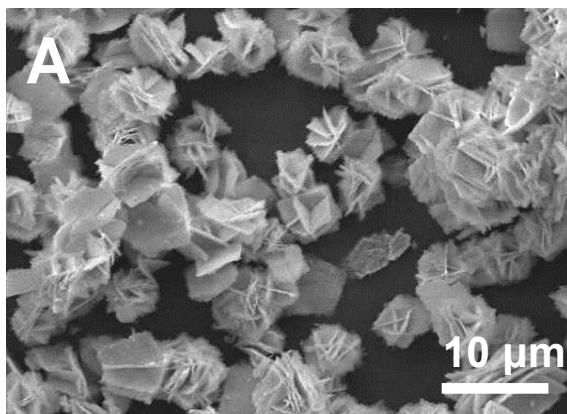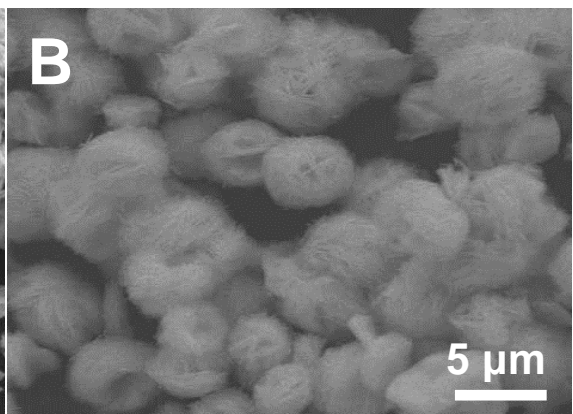

**Fig. S2.** SEM images of individual ZnO (A) and BiOCl (B)
